# Supplementary material
Source: HighWire-hosted journal article supplement (https://jnis.bmj.com/content/13/10/883)
Supplement: inline-supplementary-material-1 [file inline-supplementary-material-1.pdf]

Supplementary Figure 1

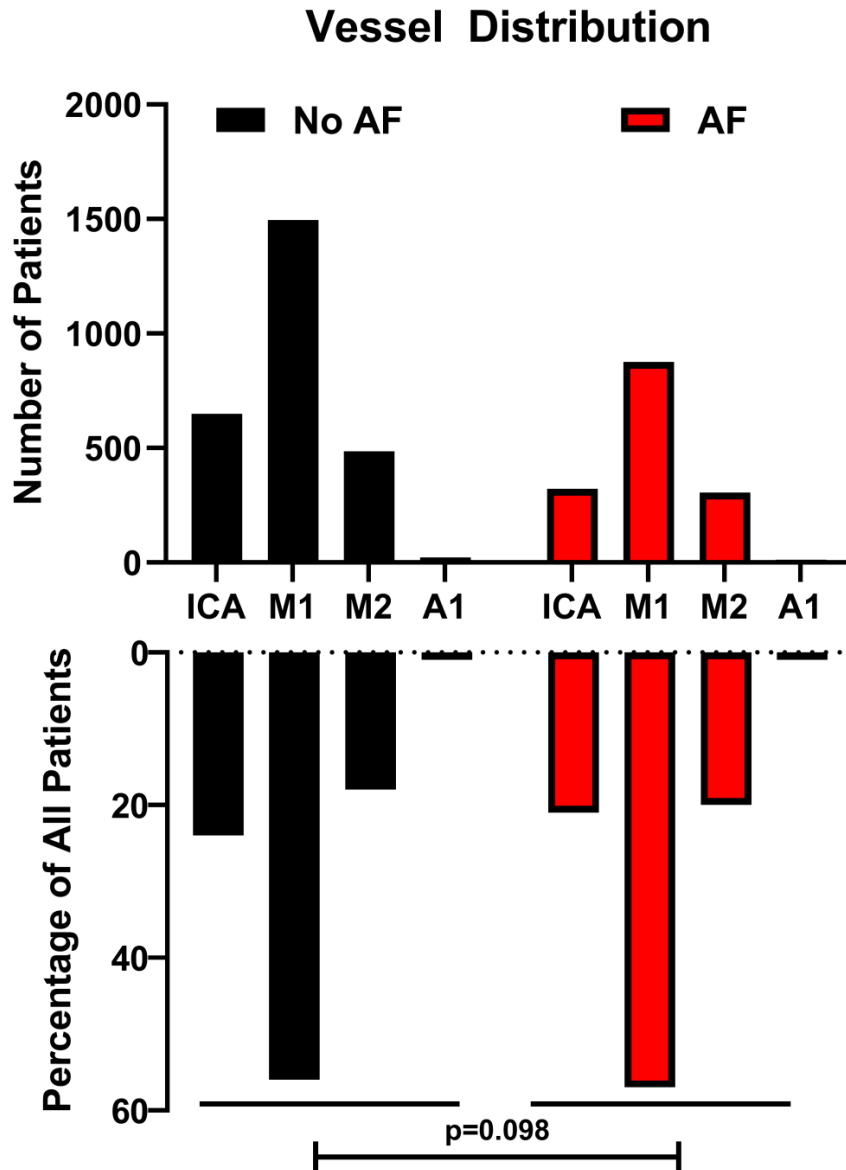

**Supplementary Figure 1. Distribution of thrombectomy patients by vessel and atrial fibrillation status.** There was no significant difference in distribution between the groups using a Chi-squared test.
